# Supplementary material
Source: PubMed Central journal article supplement (PMC7356700)
Supplement: ONCO-25-e1120-s002.pdf [file ONCO-25-e1120-s002.pdf]

Supplemental Table for:  
Successful Treatment of Cytokine Release Syndrome with IL-6 Blockade in a Patient Transitioning from Immune-Checkpoint to MEK/BRAF Inhibition: A Case Report and Review of Literature  
Clare Barber et al.

**Table S1: Cytokine Profile of Subject Patient**

| LAB           | VALUE (pg/ml) | COMPARISON TO NORMAL |
|---------------|---------------|----------------------|
| GM-CSF        | 24.83         | Median Range         |
| IFN $\gamma$  | 58.19         | High                 |
| IL-1 $\beta$  | 2.91          | Moderately High      |
| IL-2          | 3.03          | Moderately High      |
| IL-4          | 240.09        | Very High            |
| IL-5          | 6.71          | High                 |
| IL-6          | 25.23         | High                 |
| IL-8          | 68.41         | High                 |
| IL-10         | 28.7          | High                 |
| IL-12p70      | 2.13          | Median Range         |
| IL-13         | 91.26         | High                 |
| MCP-1         | 310.48        | Median Range         |
| TNF- $\alpha$ | 132.64        | Very High            |

Abbreviations: GM-CSF, Granulocyte-macrophage colony-stimulating factor; IFN, Interferon; IL, Interleukin; MCP, Monocyte chemoattractant protein-1; TNF, Tumor Necrosis Factor. Cytokine panel measured with Eve Technologies.
